# Supplementary material for: Application of high-throughput, high-depth, targeted single-nucleus DNA sequencing in pancreatic cancer
Source: bioRxiv or medRxiv preprint supplement (doi:10.1101/2022.03.06.483206), 2022-03-07
Supplement: Supplementary file [file media-3.pdf]

# Doublet rate estimation

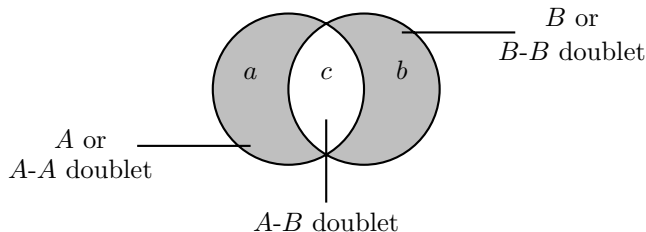

Figure 1: Venn diagram showing the different possible observations and illustrating that it is not possible to distinguish between singlets and self-doublets.

Doublets occur when multiple cells get encapsulated in the same drop and acquire the same barcode. In microfluidic experiments the doublet rate  $\delta$ , expected proportion of doublets in the data, depends on the rate at which the cells flow through the nozzle and time-interval in which a droplet is formed. When these quantities are small, the probability a doublet occurring can be approximated by a Binomial distribution [1–3] with a success probability  $\delta$ .

We start with two cell lines  $A$  and  $B$  with unknown proportions  $x$  and  $y$ , respectively. Since there are only two cell lines in the mixture, we have  $x + y = 1$ . Let  $n$  be the total number of observations, out of which  $a$  contain mutations from cell line  $A$ ,  $b$  contain mutation from cell line  $B$  and  $c$  contain mutations from both cell line  $A$  and  $B$  (see Fig. 1). As such,  $a + b + c = n$ . Our goal is to compute the doublet rate  $\delta$  for given values of  $a$ ,  $b$  and  $c$ .

We assume that the number of observation is much smaller than the size of the initial mixture from which the cells are sampled. The expected total number of singlets is  $n(1 - \delta)$ , with number of singlets of cell line  $A$  is  $x(1 - \delta)n$  and the number of singlets of cell line  $B$  is  $y(1 - \delta)n$ . Moreover, we assume that each cell in the doublet is picked independently from the mixture. A doublet can either be a neotypic  $A$ - $B$  doublet, comprising of one cell from cell line  $A$  and one cell from cell line  $B$ , or a self-doublet  $A$ - $A$  or  $B$ - $B$  comprising of two cells from the cell line  $A$  or  $B$ , respectively. The expected number of  $A$ - $A$  doublets is  $x^2\delta n$ , the expected number of  $B$ - $B$  doublets is  $y^2\delta n$  and the expected number of  $A$ - $B$  doublets is  $2xy\delta n$ . Note that the expected total number of doublets is  $n\delta$ . We need to solve the following set of nonlinear equations

$$\begin{aligned} xn(1 - \delta) + x^2\delta n &= a \\ yn(1 - \delta) + y^2\delta n &= b \\ 2xy\delta n &= c, \\ a + b + c &= n. \end{aligned}$$

We solve these nonlinear equations numerically using the open-source package SCIPY.

## References

- [1] Hamim Zafar, Anthony Tzen, Nicholas Navin, Ken Chen, and Luay Nakhleh. Sifit: inferring tumor trees from single-cell sequencing data under finite-sites models. *Genome biology*, 18(1):

1–20, 2017.

- [2] Samuel L Wolock, Romain Lopez, and Allon M Klein. Scrublet: computational identification of cell doublets in single-cell transcriptomic data. *Cell systems*, 8(4):281–291, 2019.
- [3] Leah L Weber, Palash Sashittal, and Mohammed El-Kebir. doubletd: detecting doublets in single-cell dna sequencing data. *Bioinformatics*, 37(Supplement\_1):i214–i221, 2021.
